1 Genomic characterization of respiratory syncytial virus 2022-2023 outbreak in Washington

2 State, USA

3

4 Stephanie Goya<sup>1</sup>, Jaydee Sereewit<sup>1</sup>, Daniel Pfallmer<sup>1</sup>, Tien V. Nguyen<sup>1</sup>, Shah A. K. Mohamed

5 Bakhsh<sup>1</sup>, Elizabeth B. Sobolik<sup>1</sup>, Alexander L. Greninger<sup>1,2,#</sup>.

6

7 Affiliations:

8 <sup>1</sup>Department of Laboratory Medicine and Pathology, University of Washington, Seattle, WA,

9 USA

10 <sup>2</sup>Vaccine and Infectious Disease Division, Fred Hutchinson Cancer Research Center, Seattle,

11 WA, USA

12

13 #Corresponding author.

14 Email address: [agrening@uw.edu](mailto:agrening@uw.edu)

15

16 Running title: RSV genomic characterization in WA 2022-2023 season

17 Keywords: respiratory syncytial virus, human orthopneumovirus, genome, COVID-19,

18 evolution, genotype, Washington, USA.

19

20 Abstract word count: 50

21 Manuscript word count: 799

22 **Abstract**

23 Mitigation measures against the COVID-19 pandemic affected the RSV seasonality and led to an  
24 unexpectedly high number of RSV cases in Washington State since October 2022. Here we  
25 describe the RSV genomic characteristics and evolutionary relationship of 2022 outbreak  
26 compared to the previous RSV outbreaks in the region and globally.

## 27 **Research Letter**

28 Respiratory syncytial virus (RSV) annual seasonality in Washington State (WA), USA has  
29 usually been limited to late-autumn and winter (1). However, no RSV outbreak was detected  
30 during the 2020-21 season due to the COVID-19 pandemic. After the lockdown relaxation in  
31 summer 2021, an early RSV season started in August (Figure A). The 2022-2023 outbreak also  
32 started earlier but unexpectedly, the number of RSV cases was significantly higher than 2021,  
33 alarming public health authorities and the general community (2).

34

35 This severe RSV outbreak may be due to diminished protective immunity in the population  
36 because of a prolonged period of low exposure to the pathogen (3). There is also uncertainty  
37 whether selective pressure due to the low transmission in 2020 has caused the emergence of new  
38 viral strains with improved fitness. Here, we evaluated whether the RSV causing the current  
39 outbreak has any distinctive genomic characteristics compared to strains from prior seasons.

40

41 We performed metagenomic next-generation and hybridization capture-based sequencing of 54  
42 RSV genomes, including 14 RSV strains collected from 2021-2022 and 40 from the 2022-2023  
43 outbreaks in Seattle, WA. Briefly, viral RNA was extracted from excess nasal and  
44 nasopharyngeal swab specimens collected from individuals presenting to UW Medicine COVID-  
45 19 collection sites, clinics, emergency rooms, and inpatient facilities that tested positive for RSV  
46 with a Ct value <30 (Table) (4). All individuals were outpatients except for two hospitalized  
47 patients from 2021. For phylogenetic analyses, complete genomes from both subtypes, RSV-A  
48 and RSV-B, were downloaded from NCBI GenBank and GISAID public databases. Alignments  
49 were built with MAFFT, and phylogenetic trees were inferred with IQ-TREE (5). Additional

50 methodological details are available in Appendix 1. This study was approved by the UW  
51 Institutional Review Board with a consent waiver (STUDY00000408).  
52  
53 Among the sequenced specimens, 1 RSV-A and 13 RSV-B were detected during the 2021-2022  
54 season, while 30 RSV-A and 10 RSV-B were detected during the 2022-2023 season (Table 1).  
55 No difference in the subtype predominance either by patient's age group or gender was detected  
56 in the 2022-2023 outbreak (Fisher's exact test,  $p > 0.1$ ). Genotyping showed that 7 RSV-A  
57 sequences classified as GA2.3.5 and 24 as GA2.3.6b genotypes (both comprising ON1 strains)  
58 and all RSV-B classified in the GB5.0.5.a genotype (BA strains) (6) (Appendix). Phylogenetic  
59 analysis with all RSV genomes available in public databases up to December 2022 showed that  
60 WA RSV genomes are closely related with contemporary viruses (Appendix). Reduced  
61 phylogenetic trees including all RSV genomes collected from 2017 to 2022 are shown in Figure  
62 B/C. In both RSV-A and RSV-B trees, WA genomes from 2021-2022 and 2022-2023 outbreaks  
63 were closely related. However, these sequences were not phylogenetically close with previous  
64 WA RSV genomes from 2018 and 2019. Some WA 2022 sequences were individually associated  
65 with viruses from France, Spain, Argentina, Brazil, Netherlands, Israel, Australia and North  
66 Macedonia dating from 2019, 2021 or early-2022, suggesting multiple viral introductions to the  
67 region. Nevertheless, most of analyzed WA genomes were associated in a statistically supported  
68 monophyletic clade (Figure. B and C). This result indicates that the 2022-23 WA outbreak is  
69 mainly caused by the same RSV-A and RSV-B lineages seen globally for approximately a  
70 decade. No phylogenetic relationship was seen between sequence clade and patient age.  
71

72 Analysis of the sequenced 2022-23 WA RSV-A and RSV-B strains by gene showed there had no  
73 specific non-synonymous change compared to other RSV strains reported globally. Furthermore,  
74 amino acid changes in WA RSV strains were also identified in some sequences from before the  
75 pandemic, e.g., the amino acid constellation of A103T and T122A in the RSV-A Fusion protein  
76 was also detected in other 14 genomes worldwide, including one sequence from 2019. These  
77 results may be a consequence of a bottleneck effect due to the low transmission during 2020  
78 reducing viral diversity (7). An alternating prevalence of RSV subtypes between the previous  
79 and current RSV outbreak may also be playing a role in the high levels of viral spread (Table 1).  
80 Further studies with more sequences from the region and globally are needed to confirm these  
81 hypotheses.

82

83 This study is chiefly limited by the low number of RSV genomes from WA during pre-pandemic  
84 years and convenience sampling from excess clinical specimens with limited clinical metadata.  
85 Nonetheless, WA is comparably a better sampled state for RSV sequences, as only two RSV  
86 genomes from the USA since 2017 have been derived from outside of WA.

87

88 Several studies have shown the impact on the respiratory virus ecosystem due to the COVID-19  
89 pandemic lockdown measures (8–10). Real-time genomic surveillance of a significant RSV  
90 outbreak found no new specific viral changes since the start of the pandemic that account for the  
91 increased viral spread. Our data informs the viral evolution of the reemergence of RSV in WA  
92 that will help to understand the complex relationship between herd immunity and viral evolution  
93 in the post-pandemic era.

94

95 Disclaimers

96 ALG reports contract testing from Abbott, Cepheid, Novavax, Pfizer, Janssen and Hologic and

97 research support from Gilead and Merck, outside of the described work.

98

99 **References**

100 1. Jackson ML, Scott E, Kuypers J, Nalla AK, Roychoudury P, Chu HY. Epidemiology of  
101 Respiratory Syncytial Virus Across Five Influenza Seasons Among Adults and Children One  
102 Year of Age and Older—Washington State, 2011/2012–2015/2016. *J Infect Dis*. 2021 Jan  
103 1;223(1):147–56.

104 2. Kim Schrier, Jeff Sperring. Declaration of public health emergency is urgently needed for RSV.  
105 The Seattle Times. 2022 Dec 4 [cited 2022 Dec 7]; Available from:  
106 [https://www.seattletimes.com/opinion/declaration-of-public-health-emergency-is-urgently-](https://www.seattletimes.com/opinion/declaration-of-public-health-emergency-is-urgently-needed-for-rsv/)  
107 [needed-for-rsv/](https://www.seattletimes.com/opinion/declaration-of-public-health-emergency-is-urgently-needed-for-rsv/)

108 3. Hatter L, Eathorne A, Hills T, Bruce P, Beasley R. Respiratory syncytial virus: paying the  
109 immunity debt with interest. *Lancet Child Adolesc Health*. 2021 Dec;5(12):e44–5.

110 4. Greninger AL, Waghmare A, Adler A, Qin X, Crowley JL, Englund JA, et al. Rule-Out  
111 Outbreak: 24-Hour Metagenomic Next-Generation Sequencing for Characterizing Respiratory  
112 Virus Source for Infection Prevention. *J Pediatr Infect Dis Soc*. 2017 Jun 1;6(2):168–72.

113 5. Minh BQ, Schmidt HA, Chernomor O, Schrempf D, Woodhams MD, von Haeseler A, et al. IQ-  
114 TREE 2: New Models and Efficient Methods for Phylogenetic Inference in the Genomic Era.  
115 *Mol Biol Evol*. 2020 May 1;37(5). Available from: <https://doi.org/10.1093/molbev/msaa015>

- 116 6. Goya S, Galiano M, Nauwelaers I, Trento A, Openshaw PJ, Mistchenko AS, et al. Toward  
117 unified molecular surveillance of RSV: A proposal for genotype definition. *Influenza Other*  
118 *Respir Viruses*. 2020;14(3):274–85.
- 119 7. Sanjuán R, Domingo-Calap P. Genetic Diversity and Evolution of Viral Populations. In:  
120 Bamford DH, Zuckerman M, editors. *Encyclopedia of Virology (Fourth Edition)*. Oxford:  
121 Academic Press; 2021. p. 53–61.
- 122 8. Dolores A, Stephanie G, Mercedes S NJ, Érica G, Mistchenko AS, Mariana V. RSV  
123 reemergence in Argentina since the SARS-CoV-2 pandemic. *J Clin Virol*. 2022 Apr  
124 1;149:105126.
- 125 9. Fourgeaud J, Toubiana J, Chappuy H, Delacourt C, Moulin F, Parize P, et al. Impact of public  
126 health measures on the post-COVID-19 respiratory syncytial virus epidemics in France. *Eur J*  
127 *Clin Microbiol Infect Dis Off Publ Eur Soc Clin Microbiol*. 2021 Nov;40(11):2389–95.
- 128 10. Foley DA, Yeoh DK, Minney-Smith CA, Martin AC, Mace AO, Sikazwe CT, et al. The  
129 Interseasonal Resurgence of Respiratory Syncytial Virus in Australian Children Following the  
130 Reduction of Coronavirus Disease 2019-Related Public Health Measures. *Clin Infect Dis Off*  
131 *Publ Infect Dis Soc Am*. 2021 Nov 2;73(9):e2829–30.

133 **Table 1.** Descriptive epidemiology and subtypes of RSV specimens sequenced from the 2021-  
134 2022 and 2022-2023 outbreaks in Washington State.

|                  | 2021-2022 |       |       | 2022-2023 |       |       |
|------------------|-----------|-------|-------|-----------|-------|-------|
|                  | RSV-A     | RSV-B | Total | RSV-A     | RSV-B | Total |
| Complete genomes | 1         | 13    | 14    | 30        | 10    | 40    |
| Male             |           | 6     | 6     | 13        | 7     | 20    |
| Female           | 1         | 7     | 8     | 16        | 4     | 20    |
| Clinical status  |           |       |       |           |       |       |
| Inpatient        | 1         | 1     | 2     |           |       |       |
| Outpatient       |           | 12    | 12    | 30        | 10    | 40    |
| Age group        |           |       |       |           |       |       |
| <3 years         |           | 5     | 5     | 10        | 6     | 16    |
| 3 – 18 years     |           | 3     | 3     | 10        | 2     | 12    |
| 19 – 65 years    | 1         | 4     | 5     | 8         | 1     | 9     |
| >65 years        |           | 2     | 2     | 2         | 1     | 3     |

135

### 136 **Figure Legend**

137 Figure. Phylogenetic analysis of RSV in Washington State 2021-2022.

138 A) Weekly WA PCR RSV detections by 5-week average is depicted using data from National  
139 Respiratory and Enteric Virus Surveillance System from the National Center for Immunization  
140 and Respiratory Diseases, Division of Viral Diseases, reviewed up to 07 Dec 2022. Orange and  
141 green dots show the collection date RSV genomes analyzed in this study. Maximum likelihood  
142 trees for RSV-A (B) and RSV-B (C) complete genomes collected from 2017 to 2022. Details on  
143 the phylogenetic association of the WA genomes are shown in larger size including the UF-  
144 bootstrap for the main phylogenetic clades. Lineages GA2.3.5 and GA2.3.6b in RSV-B and  
145 GB5.0.5a in RSV-B are labeled in their ancestral nodes. The collection year of the specimens is  
146 depicted by tree branch color. RSV genomes from the USA are highlighted with a light blue  
147 circle at the tip. WA RSV genomes from the epidemic seasons 2021-2022 and 2022-2023 are  
148 highlighted in shades of green for RSV-A and orange for RSV-B. In the larger size panels the



149 age group for each patient is detailed with a symbol detailed in the legend. The scale bar  
150 represents the inferred number of nucleotide substitutions per site.

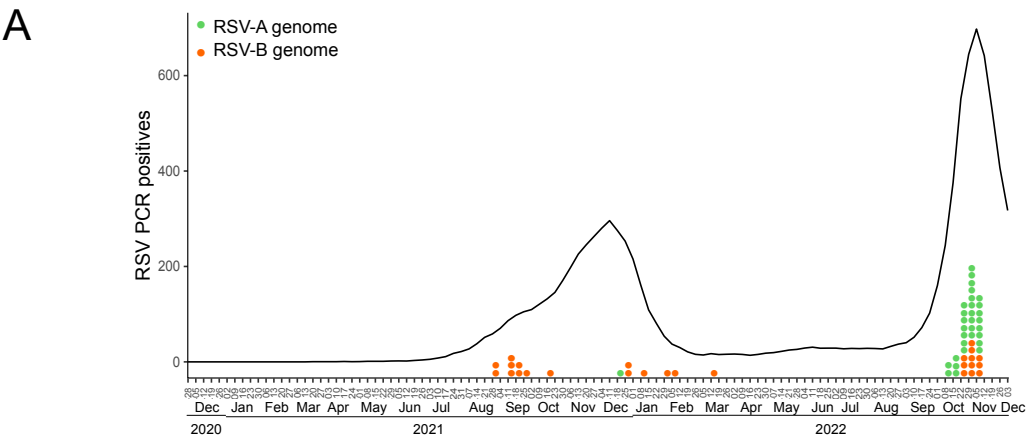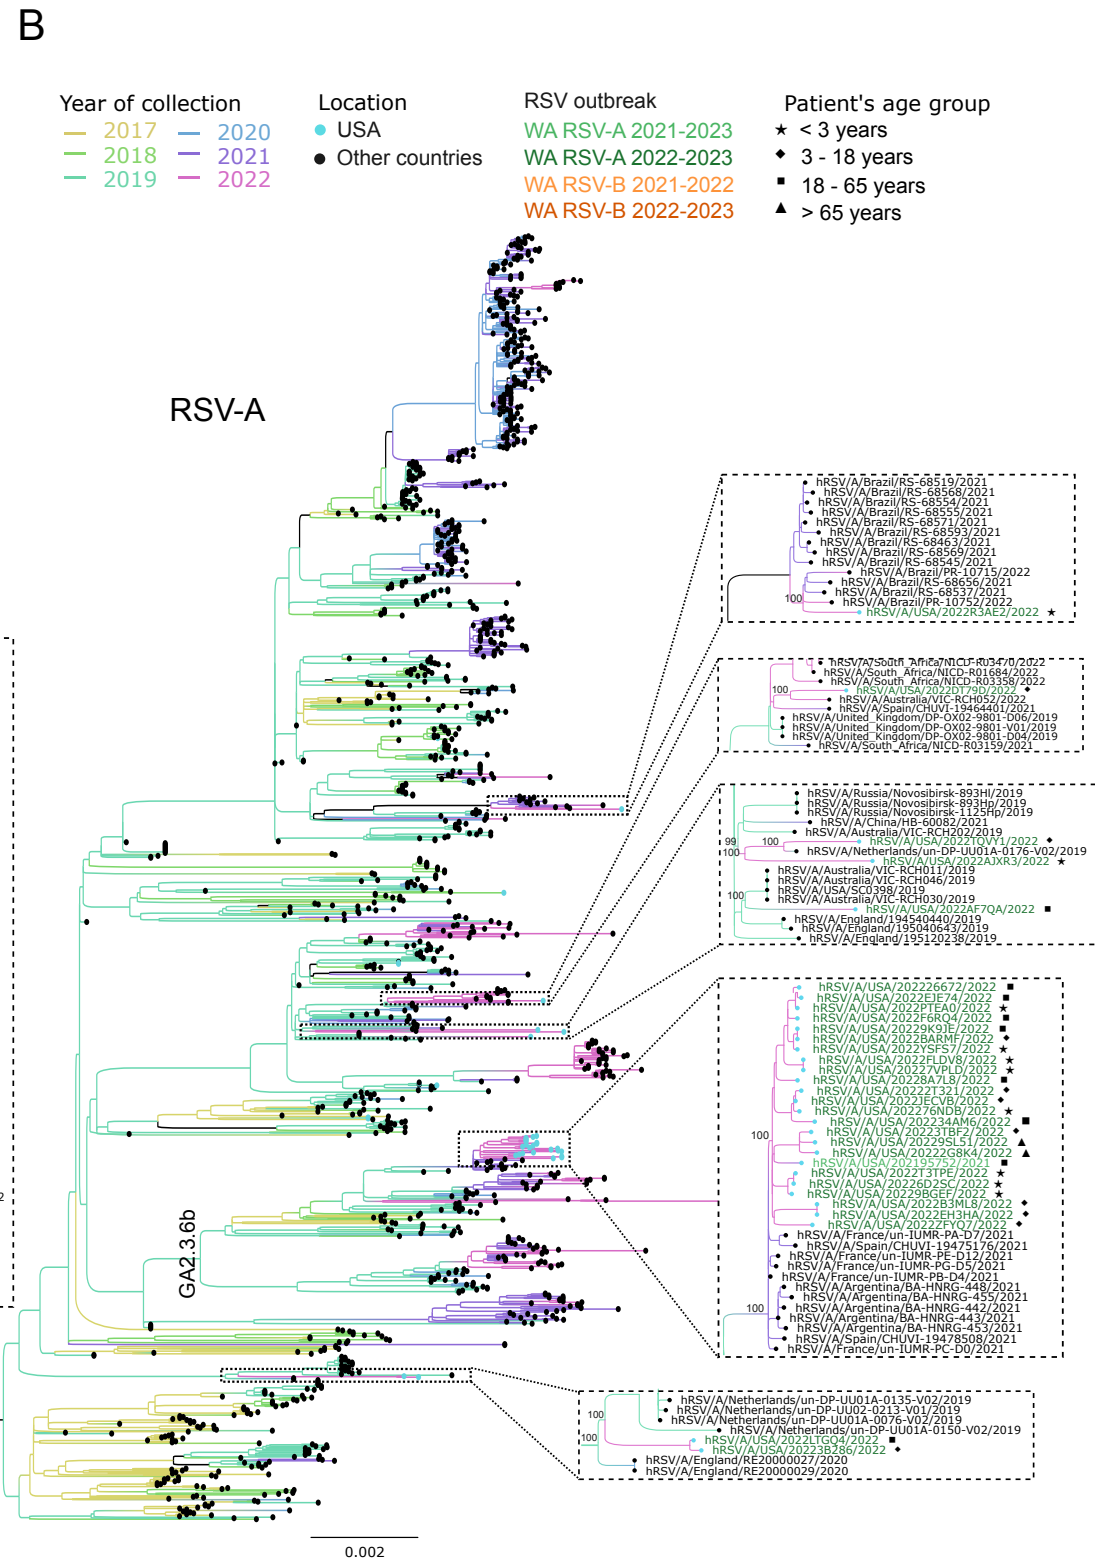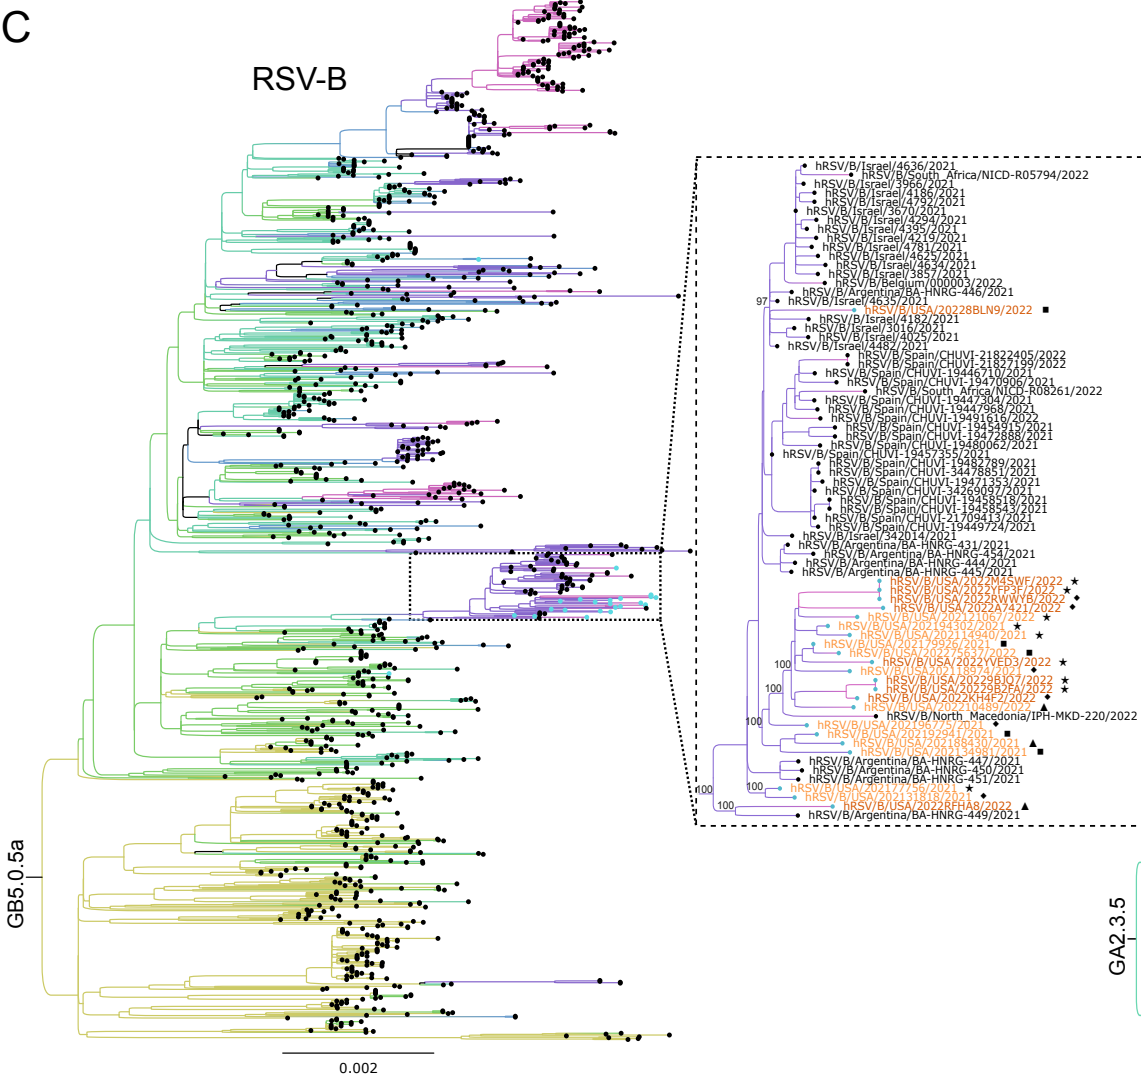

Source: https://medrxiv.org/content/10.1101/2022.12.12.22283375v1.full.pdf
